# Supplementary material for: Growth and stress response mechanisms underlying post-feeding regenerative organ growth in the Burmese python
Source: PubMed Central journal article supplement (PMC5412052; doi:10.1186/s12864-017-3743-1), 2017-05-02
Supplement: 12864_2017_3743_MOESM1_ESM.pdf [file 12864_2017_3743_MOESM1_ESM.pdf]

## Supplementary Methods

### **Feeding Experiments**

The following information pertains to snakes that were sampled and sequenced for this study (see also Additional file 1, Table S1; and [5, 13] for details regarding previously sequenced data incorporated in this study). Burmese pythons (*Python molurus bivittatus*) were purchased within 1-2 months of hatching from commercial vendors. All snakes included in this study originated from captive colonies, were phenotypically normal in coloration (i.e., no albino animals), and ranged in age from 9 months to 6 years (mean = 1.9 years) and in mass from 406 to 5,776 grams (mean = 1,036 g). Snakes were housed individually in 12L plastic bins that slide into customized racks in the Central Animal Care Facility at the University of Alabama. Each bin featured a floor substrate of newspaper and contained a water bowl. All pythons were maintained on a light/dark cycle of 14 hours of light followed by 10 hours of dark. Room temperature was maintained at 26-28°C and was constantly monitored by the Central Animal Care Facility. Prior to experimentation, pythons were fed weekly a meal of 1-2 rodents (adult mice or small rats) and water was provided *ad libitum*. Pythons were monitored daily by the Animal Care staff and personnel of the laboratory of Dr. Stephen Secor prior to and during experimentation. There were no interventions in snake care prior to or during experimentation. All experimentation and dissection was performed by Secor lab personnel. No special attention was given to selecting animals randomly from a research colony, however there was an attempt for matching in sexes (7 males: 6 females), so that there would be no bias due to sex in any treatment or the experiment overall. At the time of sampling, all animals were in good health and had not been subjected to any previous procedures or drug administration. Fasted snakes had been fasted for a minimum of 30 days prior to sampling. Snakes of the 1 and 4 days post-feeding treatments had been fasted for 30 days and then fed a rodent meal equal in mass to 25% of the snake body mass, and sampled 1 and 4 days after feeding, respectively. The mean mass of snakes in each treatment were: fasted (1,504 g), 1DPF (892 g), and 4DPF (593 g). At the time of sampling, snakes were sacrificed by humanely severing the spinal cord immediately behind the head; this provided the most efficient and rapid means to obtain organ samples for storage and study without compromising physiological responses of interest. Organ tissues were immediately extracted, snap frozen in liquid nitrogen, and stored at -80°C. Feeding experiments and subsequent sampling of snakes were completed over a span of several years, with fasted snakes sampled in 2005 and 2009, and 1 and 4DPF snakes sampled in 2005 and 2006. There was no particular order to the sampling of tissues from animals. No adverse events occurred during animal care or experimentation, and thus no modifications to the experimental protocol were undertaken as a result.

The Burmese python has become an outstanding animal model (compared to traditional mammal model systems) to explore the cellular and molecular mechanisms underlying regenerative organ growth and physiology, and therefore serves as an excellent replacement for exploring such systems in typical mammalian models. We made efforts to minimize the number of animals used overall in this study, as evident in the relatively small sample sizes for each treatment (3-6 individuals). Additionally, dissection of snakes included the removal and storage of all organs and other tissues (muscle, blood, etc.) so that subsequent studies can

utilize these tissues to study this regenerative phenotype in other organ systems without the need for the sacrifice of additional animals.

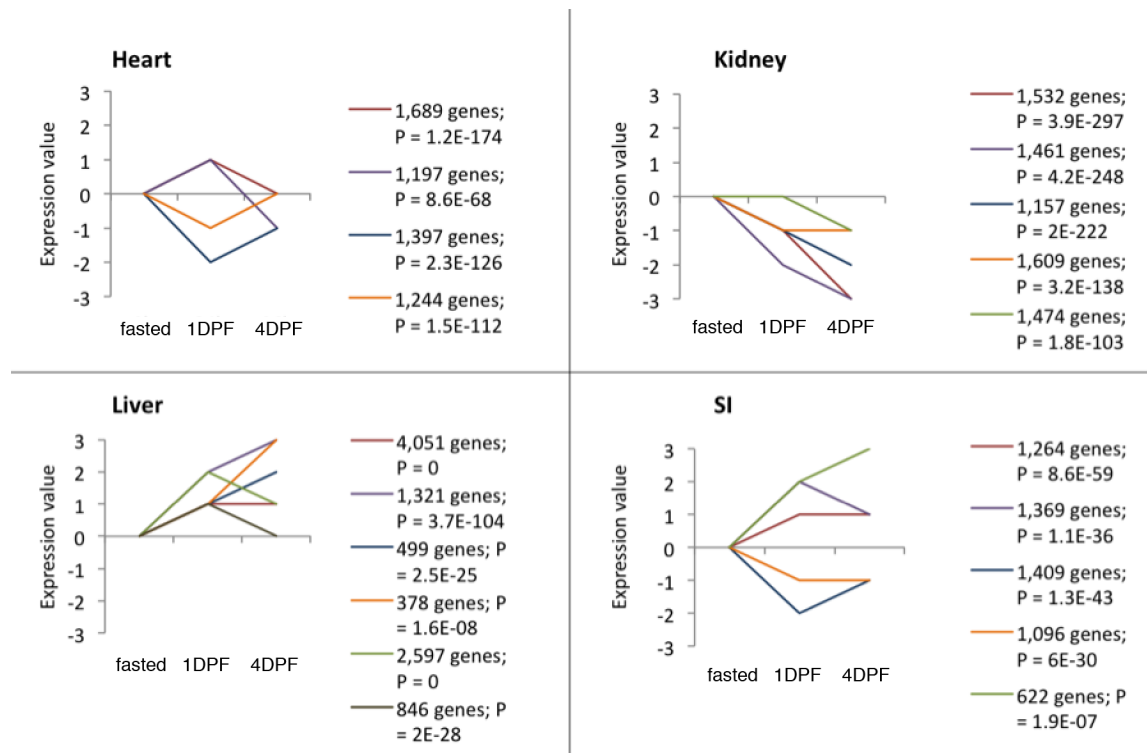

**Figure S1. STEM analysis of all genes differentially expressed across all time points (fasted – 4DPF).** All significant expression profiles are shown with P-value and number of genes following that profile.

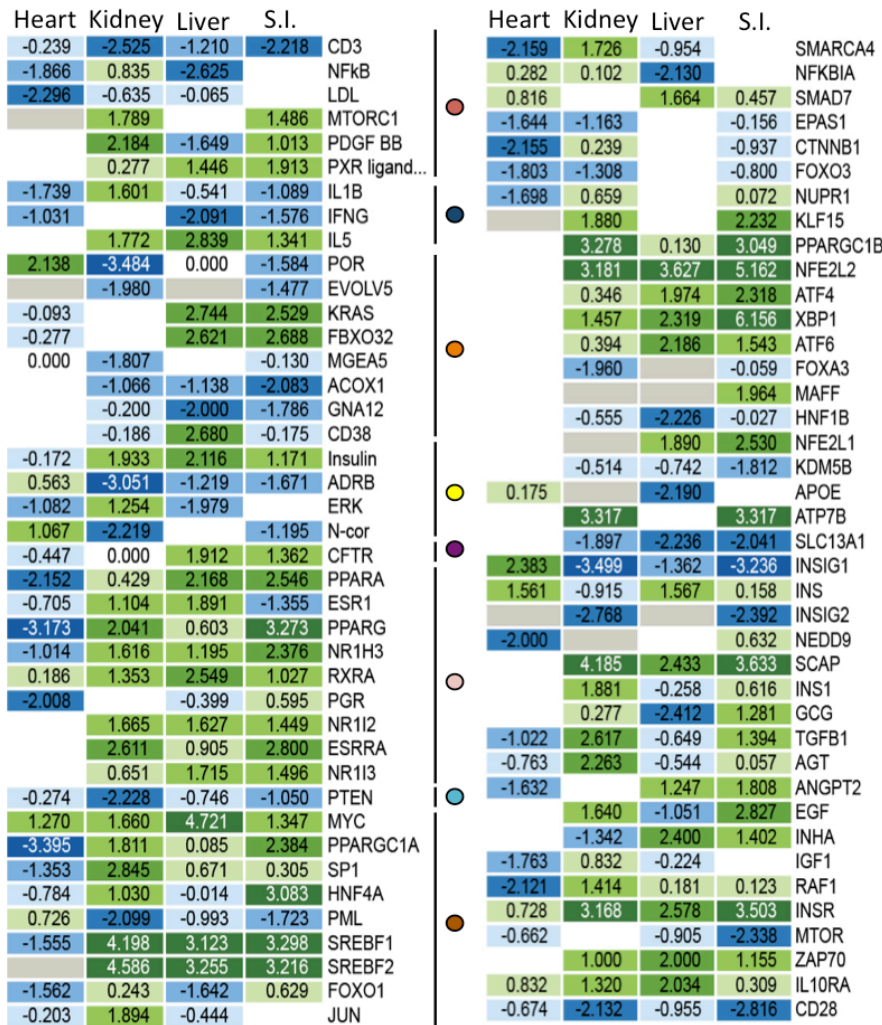

- Complex
- Cytokine
- Enzyme
- Group
- Ion Channel
- Ligand-dependent nuclear receptor
- Phosphatase
- Transcription regulator
- Transporter
- Other
- Growth factors
- Kinase receptors
- Transmembrane receptors

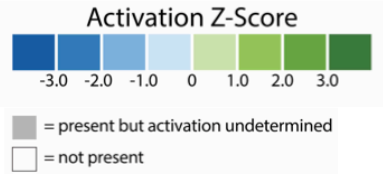

**Figure S2. Heat maps depicting activation z-scores for classes of upstream regulator molecules significant between fasted and 1DPF.** Green indicates predicted activation, blue indicates predicted inhibition, white indicates that the regulator is not predicted to function in that organ, and grey indicates that the upstream regulator is predicted to have significant involvement but the activation state cannot be determined based on the gene expression data. Regulators shown on the heat maps were filtered by activation z-scores greater than  $|1.5|$  in at least one tissue.

# Kidney

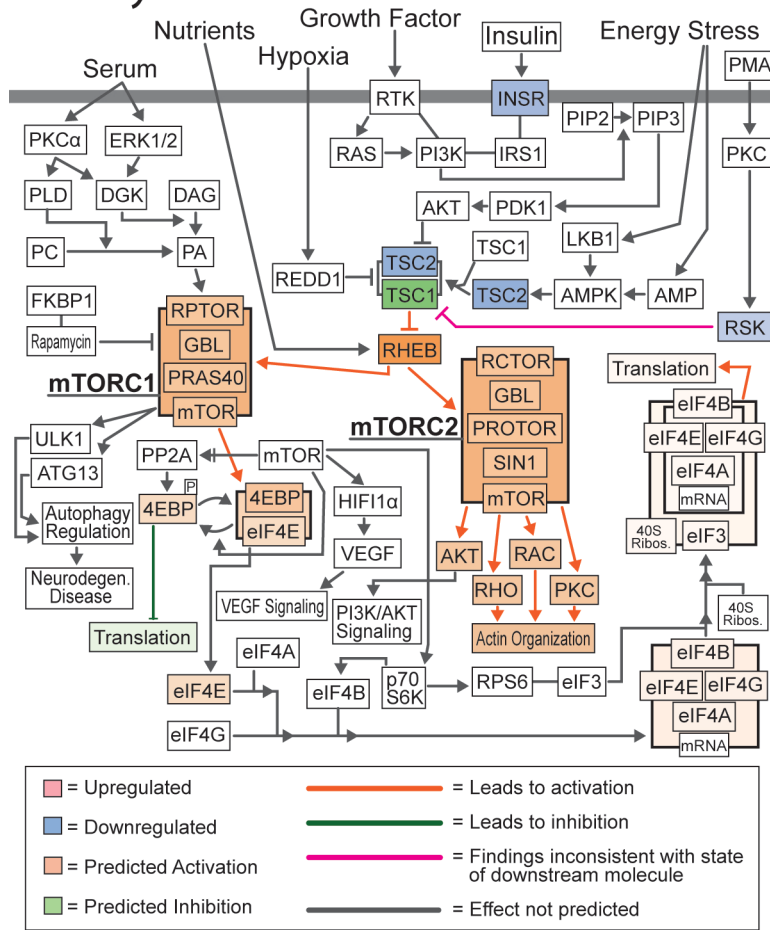

**Figure S3. Combined gene expression and predicted activation information for the mTOR pathway in the kidney.** Differentially expressed genes identified in our RNA-seq data are highlighted in red (upregulated) and blue (downregulated) while predicted activation states are highlighted in orange (activation) and green (inhibition).

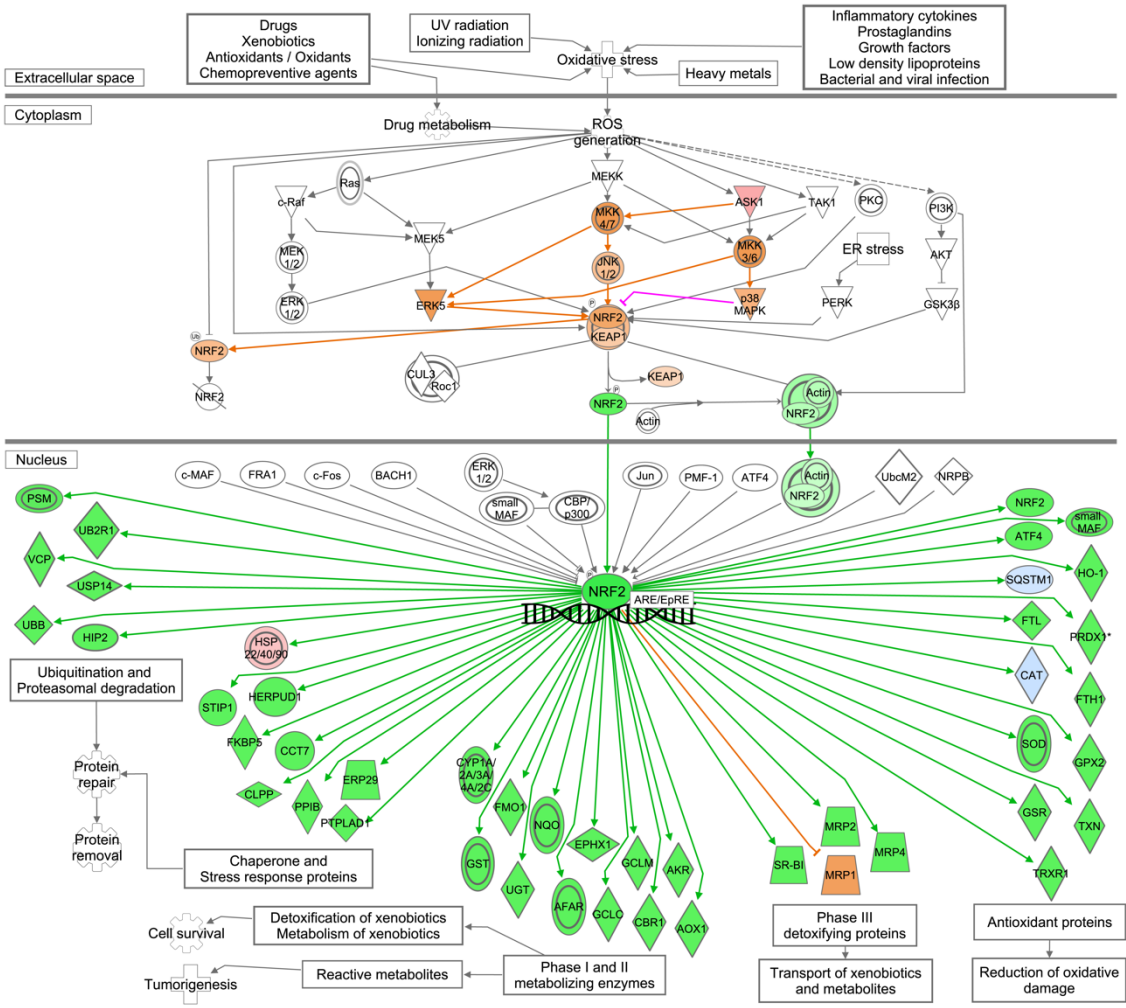

**Figure S4. Pathway prediction for the NRF2-mediated oxidative stress response in the heart.** Predicted activation state of the pathway was estimated using genes identified as significantly differentially expressed from our RNA-seq data set.

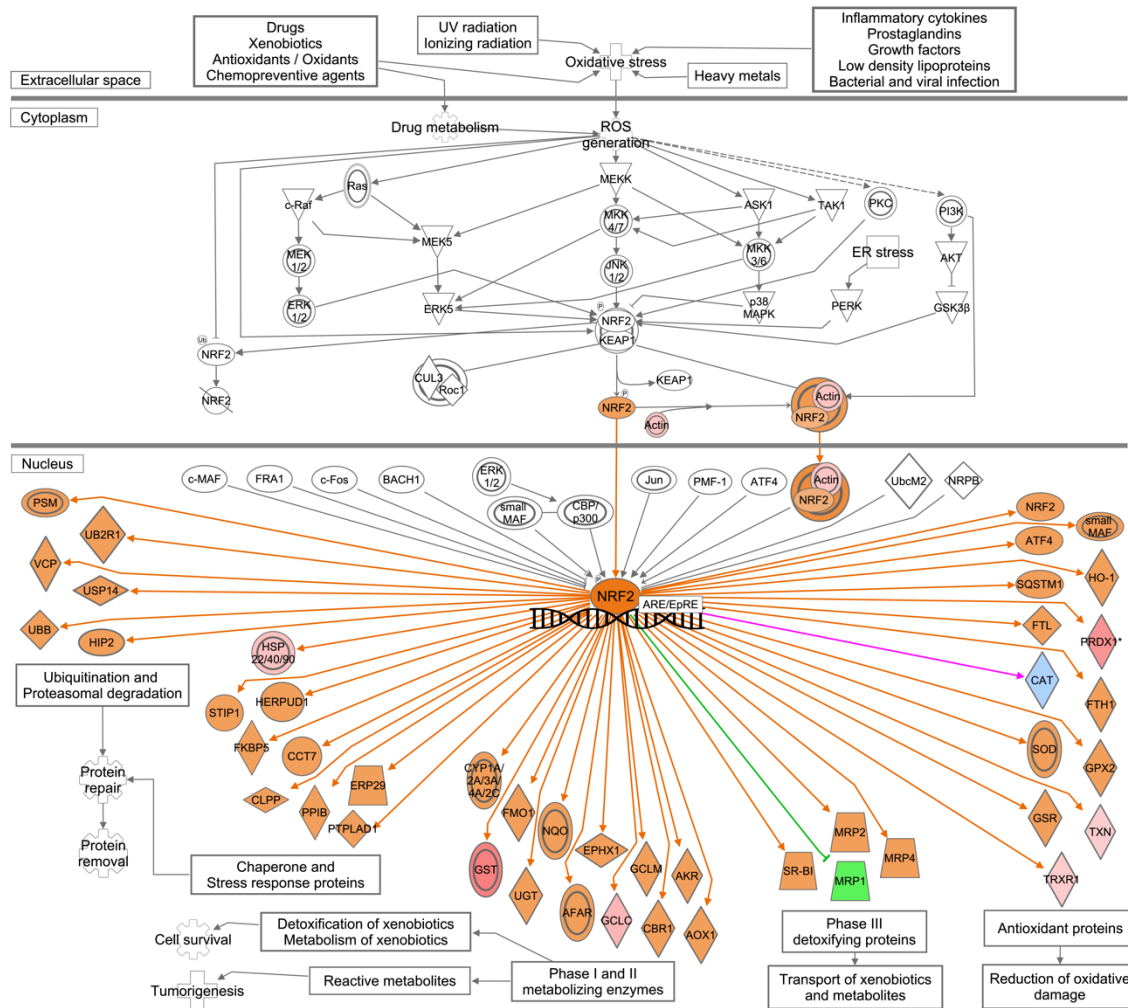

**Figure S5. Pathway prediction for the NRF2-mediated oxidative stress response in the kidney.** Predicted activation state of the pathway was estimated using genes identified as significantly differentially expressed from our RNA-seq data set.

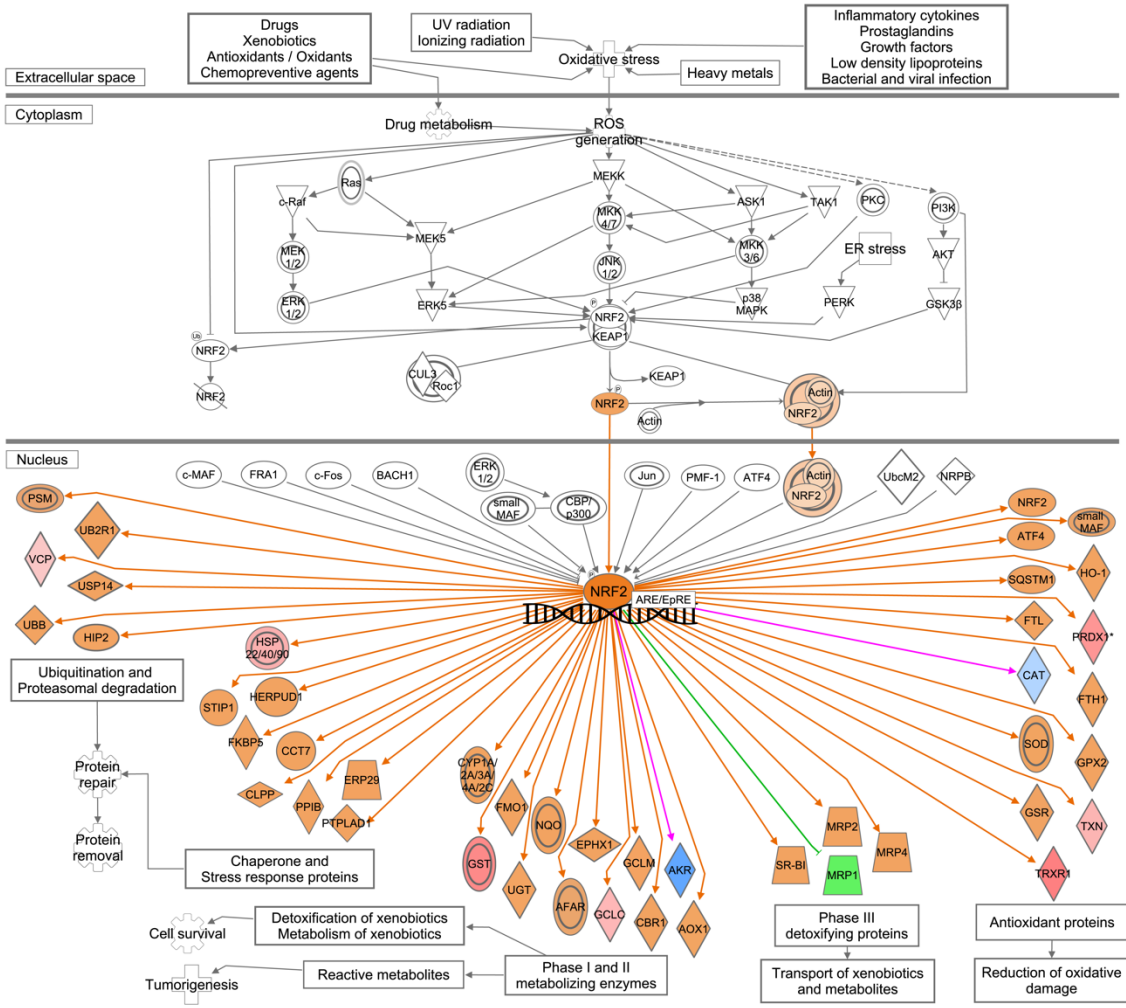

**Figure S6. Pathway prediction for the NRF2-mediated oxidative stress response in the liver.** Predicted activation state of the pathway was estimated using genes identified as significantly differentially expressed from our RNA-seq data set.



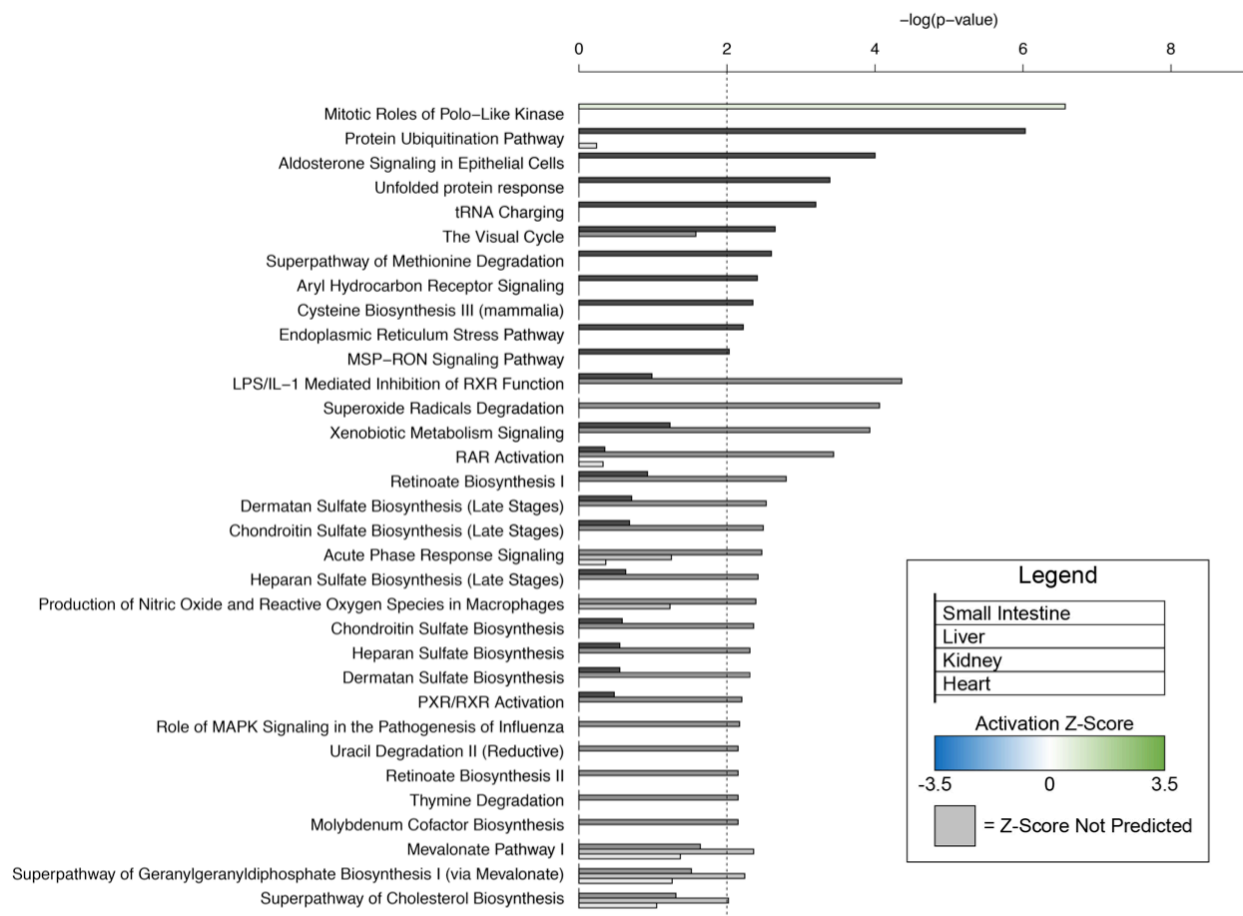

**Figure S7. Pathway analysis of all genes significantly differentially expressed from 1DPF to 4DPF in the four organs.** Bar graph showing significant canonical pathways (Fisher's Exact test  $P < 0.01$ ) enriched for genes differentially expressed at these time points. Pathways were filtered to include those with at least one significant p-value in one of the four organs. Bars are colored based on the predicted activation Z-score for that pathway.

**Table S1. Sequencing information for all included python samples.** PE76 and PE120 stand for the sequence read type (e.g., Paired-end 76bp). The year provided represents the year in which the sample was sequenced.

| Tissue | Timepoint | Animal ID | Instrument | cDNA prep kit   | Year | Sequence type | Library Name |
|--------|-----------|-----------|------------|-----------------|------|---------------|--------------|
| Heart  | fasted    | A16_1     | GAllx      | Illumina Truseq | 2010 | PE76          | TC01         |
| Heart  | fasted    | A16_2     | GAllx      | Illumina Truseq | 2011 | PE120         | TC05         |
| Heart  | fasted    | A111      | GAllx      | Illumina Truseq | 2010 | PE76          | TC01         |
| Heart  | fasted    | A18       | HiSeq      | NEB Next        | 2013 | SE50          | pRNA-A       |
| Heart  | fasted    | U25       | HiSeq      | NEB Next        | 2013 | SE50          | pRNA-B       |
| Heart  | 1DPF      | Z12       | GAllx      | Illumina Truseq | 2010 | PE76          | TC01         |
| Heart  | 1DPF      | Z14_1     | GAllx      | Illumina Truseq | 2010 | PE76          | TC01         |
| Heart  | 1DPF      | Z14_2     | GAllx      | Illumina Truseq | 2011 | PE120         | TC05         |
| Heart  | 1DPF      | Z18       | GAllx      | Illumina Truseq | 2010 | PE76          | TC01         |
| Heart  | 4DPF      | Y5_1      | GAllx      | Illumina Truseq | 2010 | PE76          | TC01         |
| Heart  | 4DPF      | Y5_2      | GAllx      | Illumina Truseq | 2011 | PE120         | TC05         |
| Heart  | 4DPF      | Y18       | GAllx      | Illumina Truseq | 2010 | PE76          | TC01         |
| Heart  | 4DPF      | Y23       | GAllx      | Illumina Truseq | 2010 | PE76          | TC01         |
| Kidney | fasted    | A18       | HiSeq      | NEB Next        | 2013 | SE50          | pRNA-A       |
| Kidney | fasted    | U25       | HiSeq      | NEB Next        | 2013 | SE50          | pRNA-B       |
| Kidney | fasted    | A16_1     | HiSeq      | Illumina Truseq | 2011 | SE50          | s1           |
| Kidney | fasted    | A16_2     | GAllx      | Illumina Truseq | 2011 | PE120         | SP03         |
| Kidney | fasted    | A111_1    | HiSeq      | Illumina Truseq | 2011 | SE50          | s1           |
| Kidney | fasted    | A111_2    | GAllx      | Illumina Truseq | 2011 | PE120         | SP03         |
| Kidney | fasted    | AJ6_1     | HiSeq      | Illumina Truseq | 2011 | SE50          | s1           |
| Kidney | fasted    | AJ6_2     | GAllx      | Illumina Truseq | 2011 | PE120         | SP03         |
| Kidney | fasted    | AJ6_3     | GAllx      | Illumina Truseq | 2011 | PE120         | TC05         |
| Kidney | 1DPF      | Z12_1     | HiSeq      | Illumina Truseq | 2011 | SE50          | s1           |
| Kidney | 1DPF      | Z12_2     | GAllx      | Illumina Truseq | 2011 | PE120         | SP03         |
| Kidney | 1DPF      | Z14_1     | HiSeq      | Illumina Truseq | 2011 | SE50          | s1           |
| Kidney | 1DPF      | Z14_2     | GAllx      | Illumina Truseq | 2011 | PE120         | SP03         |
| Kidney | 1DPF      | Z18_1     | HiSeq      | Illumina Truseq | 2011 | SE50          | s1           |
| Kidney | 1DPF      | Z18_2     | GAllx      | Illumina Truseq | 2011 | PE120         | SP03         |
| Kidney | 1DPF      | Z18_3     | GAllx      | Illumina Truseq | 2011 | PE120         | TC05         |
| Kidney | 1DPF      | V43       | HiSeq      | NEB Next        | 2013 | SE50          | pRNA-B       |
| Kidney | 1DPF      | Z14_3     | HiSeq      | NEB Next        | 2013 | SE50          | pRNA-B       |
| Kidney | 4DPF      | Y18_1     | HiSeq      | NEB Next        | 2013 | SE50          | pRNA-B       |
| Kidney | 4DPF      | Y24       | HiSeq      | NEB Next        | 2013 | SE50          | pRNA-A       |
| Kidney | 4DPF      | Y5_1      | HiSeq      | Illumina Truseq | 2011 | SE50          | s1           |
| Kidney | 4DPF      | Y5_2      | GAllx      | Illumina Truseq | 2011 | PE120         | SP03         |
| Kidney | 4DPF      | Y5_3      | GAllx      | Illumina Truseq | 2011 | PE120         | TC05         |
| Kidney | 4DPF      | Y18_2     | HiSeq      | Illumina Truseq | 2011 | SE50          | s1           |

|                 |        |        |       |                 |      |       |        |
|-----------------|--------|--------|-------|-----------------|------|-------|--------|
| Kidney          | 4DPF   | Y18_3  | GAllx | Illumina Truseq | 2011 | PE120 | SP03   |
| Kidney          | 4DPF   | Y23_1  | HiSeq | Illumina Truseq | 2011 | SE50  | s1     |
| Kidney          | 4DPF   | Y23_2  | GAllx | Illumina Truseq | 2011 | PE120 | SP03   |
| Liver           | fasted | A16_1  | GAllx | Illumina Truseq | 2010 | PE76  | TC01   |
| Liver           | fasted | A16_2  | GAllx | Illumina Truseq | 2011 | PE120 | TC05   |
| Liver           | fasted | A18    | HiSeq | NEB Next        | 2013 | SE50  | pRNA-A |
| Liver           | fasted | A111   | HiSeq | NEB Next        | 2013 | SE50  | pRNA-B |
| Liver           | fasted | U25    | HiSeq | NEB Next        | 2013 | SE50  | pRNA-B |
| Liver           | 1DPF   | V43    | HiSeq | NEB Next        | 2013 | SE50  | pRNA-B |
| Liver           | 1DPF   | Z14    | HiSeq | NEB Next        | 2013 | SE50  | pRNA-A |
| Liver           | 1DPF   | Z18    | HiSeq | NEB Next        | 2013 | SE50  | pRNA-B |
| Liver           | 1DPF   | Z12_1  | GAllx | Illumina Truseq | 2010 | PE76  | TC01   |
| Liver           | 1DPF   | Z12_2  | GAllx | Illumina Truseq | 2011 | PE120 | TC05   |
| Liver           | 4DPF   | Y5_1   | GAllx | Illumina Truseq | 2010 | PE76  | TC01   |
| Liver           | 4DPF   | Y5_2   | GAllx | Illumina Truseq | 2011 | PE120 | TC05   |
| Liver           | 4DPF   | Y18    | HiSeq | NEB Next        | 2013 | SE50  | pRNA-B |
| Liver           | 4DPF   | Y23    | HiSeq | NEB Next        | 2013 | SE50  | pRNA-B |
| Liver           | 4DPF   | Y24    | HiSeq | NEB Next        | 2013 | SE50  | pRNA-A |
| Small intestine | fasted | A18    | HiSeq | NEB Next        | 2013 | SE50  | pRNA-A |
| Small intestine | fasted | A111   | HiSeq | NEB Next        | 2013 | SE50  | pRNA-B |
| Small intestine | fasted | U25    | HiSeq | NEB Next        | 2013 | SE50  | pRNA-A |
| Small intestine | fasted | A16_1  | HiSeq | Illumina Truseq | 2011 | SE50  | s1     |
| Small intestine | fasted | A16_2  | GAllx | Illumina Truseq | 2011 | PE120 | SP03   |
| Small intestine | fasted | A111_1 | HiSeq | Illumina Truseq | 2011 | SE50  | s1     |
| Small intestine | fasted | A111_2 | GAllx | Illumina Truseq | 2011 | PE120 | SP03   |
| Small intestine | fasted | AJ6_1  | HiSeq | Illumina Truseq | 2011 | SE50  | s1     |
| Small intestine | fasted | AJ6_2  | GAllx | Illumina Truseq | 2011 | PE120 | TC05   |
| Small intestine | fasted | AJ6_3  | GAllx | Illumina Truseq | 2011 | PE120 | TC05   |
| Small intestine | 1DPF   | Z12_1  | HiSeq | Illumina Truseq | 2011 | SE50  | s1     |
| Small intestine | 1DPF   | Z12_2  | GAllx | Illumina Truseq | 2011 | PE120 | SP03   |
| Small intestine | 1DPF   | Z14_1  | HiSeq | Illumina Truseq | 2011 | SE50  | s1     |
| Small intestine | 1DPF   | Z14_2  | GAllx | Illumina Truseq | 2011 | PE120 | SP03   |
| Small intestine | 1DPF   | Z14_3  | GAllx | Illumina Truseq | 2011 | PE120 | TC05   |
| Small intestine | 1DPF   | Z18_1  | HiSeq | Illumina Truseq | 2011 | SE50  | s1     |
| Small intestine | 1DPF   | Z18_2  | GAllx | Illumina Truseq | 2011 | PE120 | SP03   |
| Small intestine | 1DPF   | V43    | HiSeq | NEB Next        | 2013 | SE50  | pRNA-B |
| Small intestine | 1DPF   | Z18_3  | HiSeq | NEB Next        | 2013 | SE50  | pRNA-B |
| Small intestine | 4DPF   | Y24    | HiSeq | NEB Next        | 2013 | SE50  | pRNA-B |
| Small intestine | 4DPF   | Y5_1   | HiSeq | Illumina Truseq | 2011 | SE50  | s1     |
| Small intestine | 4DPF   | Y5_2   | GAllx | Illumina Truseq | 2011 | PE120 | SP03   |
| Small intestine | 4DPF   | Y18_1  | HiSeq | Illumina Truseq | 2011 | SE50  | s1     |

|                 |      |       |       |                 |      |       |      |
|-----------------|------|-------|-------|-----------------|------|-------|------|
| Small intestine | 4DPF | Y18_2 | GAllx | Illumina Truseq | 2011 | PE120 | SP03 |
| Small intestine | 4DPF | Y18_3 | GAllx | Illumina Truseq | 2011 | PE120 | TC05 |
| Small intestine | 4DPF | Y23_1 | HiSeq | Illumina Truseq | 2011 | SE50  | s1   |
| Small intestine | 4DPF | Y23_2 | GAllx | Illumina Truseq | 2011 | PE120 | SP03 |

**Table S2. The number of genes involved in each pathway as defined by IPA, the number of genes in the pathway that were assigned python orthologs via tblastx, and the number of those python orthologs observed with a non-zero level of expression in our dataset.**

| Pathway | Organ      | Number of Genes | Number of genes assigned an orthologous python gene | Number of genes assigned an orthologous python gene and observed as expressed in dataset |
|---------|------------|-----------------|-----------------------------------------------------|------------------------------------------------------------------------------------------|
| mTOR    | Heart      | 199             | 172                                                 | 169                                                                                      |
|         | Kidney     |                 |                                                     | 170                                                                                      |
|         | Liver      |                 |                                                     | 167                                                                                      |
|         | Small Int. |                 |                                                     | 171                                                                                      |
| NRF2    | Heart      | 292             | 223                                                 | 220                                                                                      |
|         | Kidney     |                 |                                                     | 222                                                                                      |
|         | Liver      |                 |                                                     | 218                                                                                      |
|         | Small Int. |                 |                                                     | 220                                                                                      |
